# Supplementary material for: Antimicrobial Effects of Some Natural Products on Adhesion and Biofilm Inhibition of Clostridioides difficile
Source: MDPI journal article supplement (doi:10.3390/pharmaceutics16040478), 2024-03-30
Supplement: s1 [file s1]

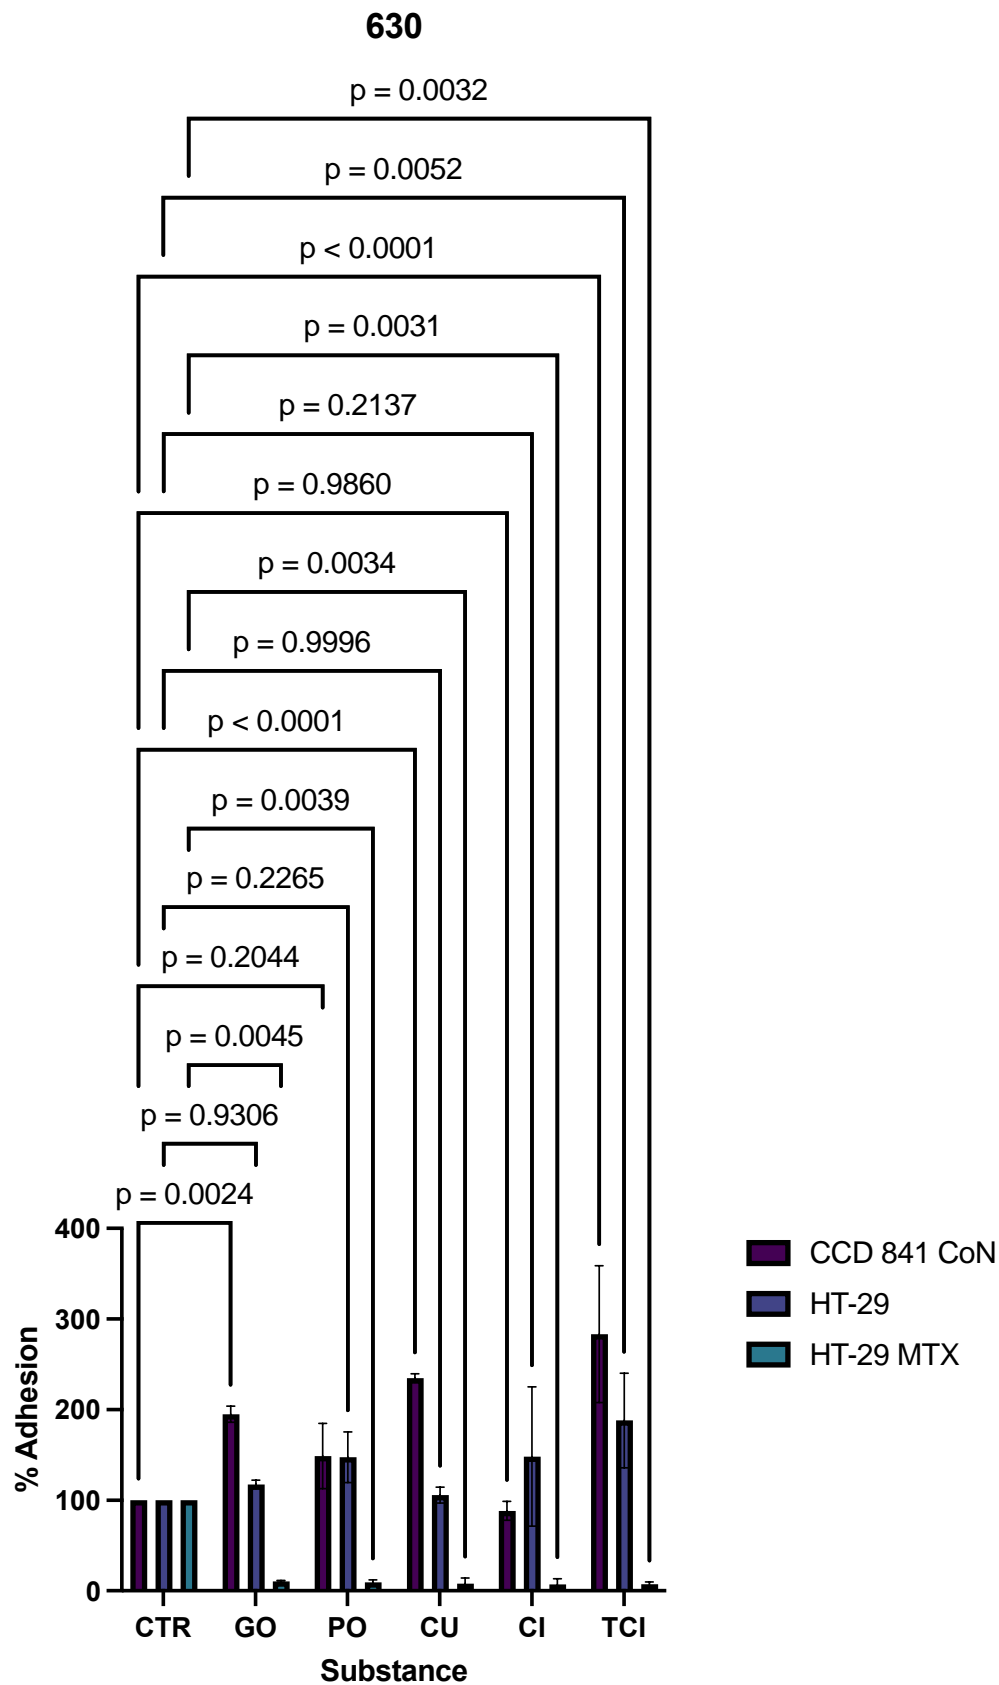

Figure S1. The effects of tested substances on adhesion of *C. difficile* strain 630 to three different cell lines including pairwise comparisons. Error bars represent standard deviations. CTR – positive control; GO – ginger oil; PO – peppermint oil; CU – curcumin; CI – cinnamaldehyde; TCI - trans-cinnamaldehyde.

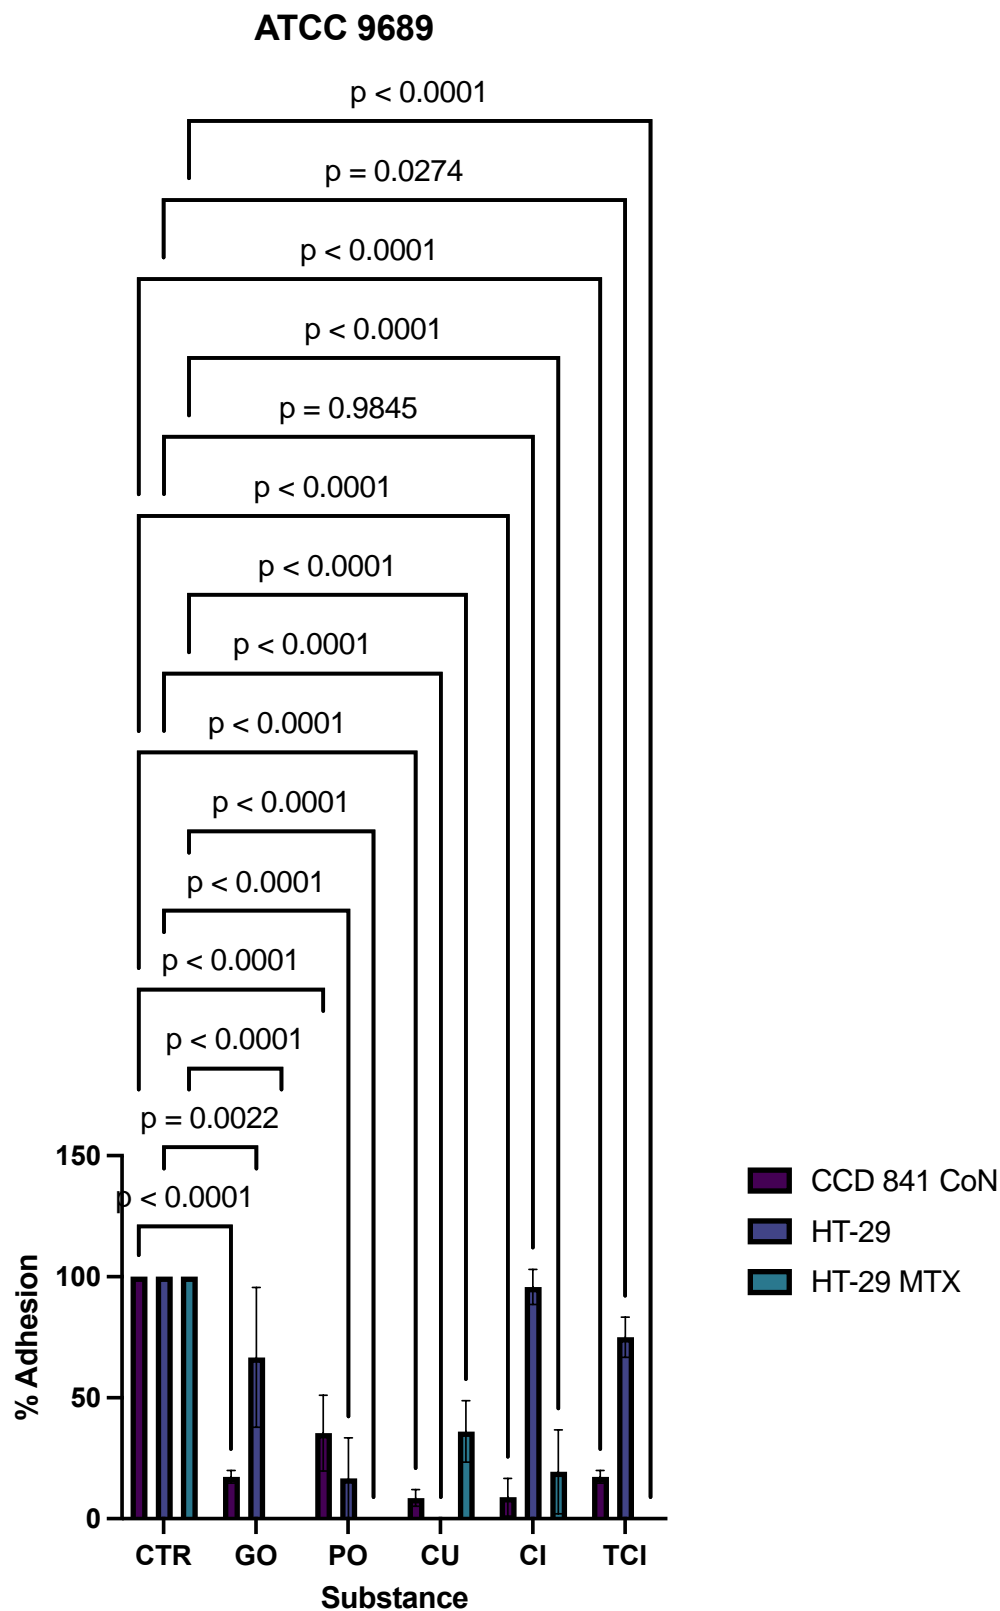

Figure S2. The effects of tested substances on adhesion of *C. difficile* strain ATCC 9689 to three different cell lines including pairwise comparisons. Error bars represent standard deviations. CTR – positive control; GO – ginger oil; PO – peppermint oil; CU – curcumin; CI – cinnamaldehyde; TCI - trans-cinnamaldehyde.

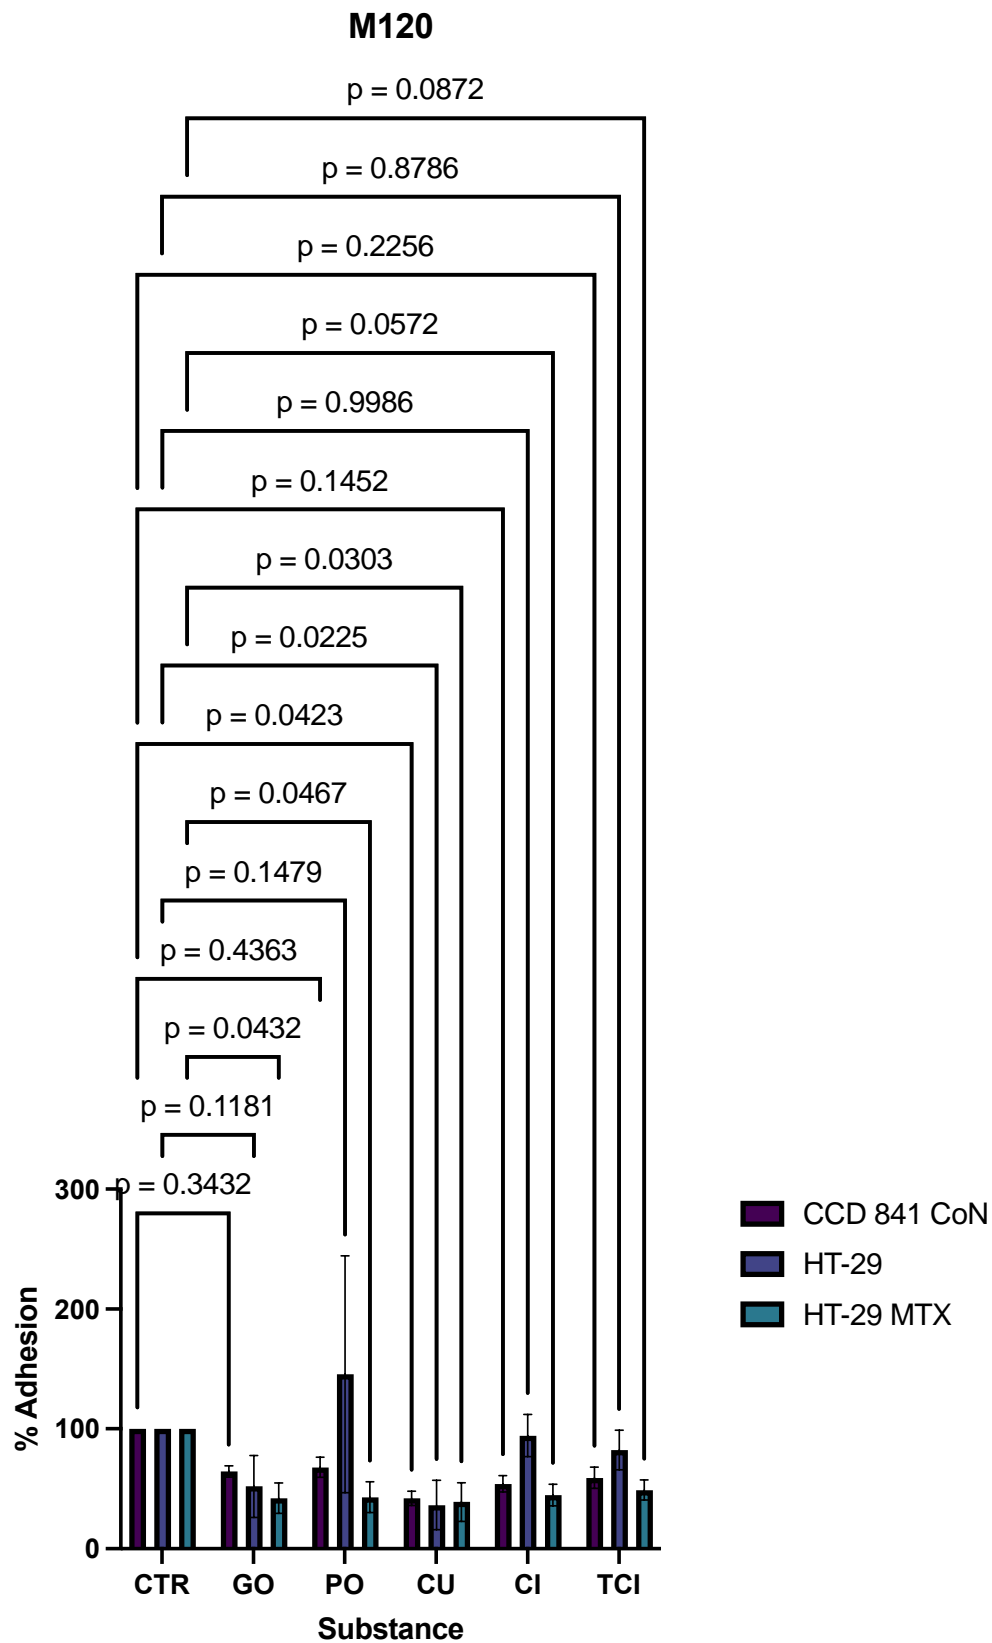

Figure S3. The effects of tested substances on adhesion of *C. difficile* strain M120 to three different cell lines including pairwise comparisons. Error bars represent standard deviations. CTR – positive control; GO – ginger oil; PO – peppermint oil; CU – curcumin; CI – cinnamaldehyde; TCI - trans-cinnamaldehyde.

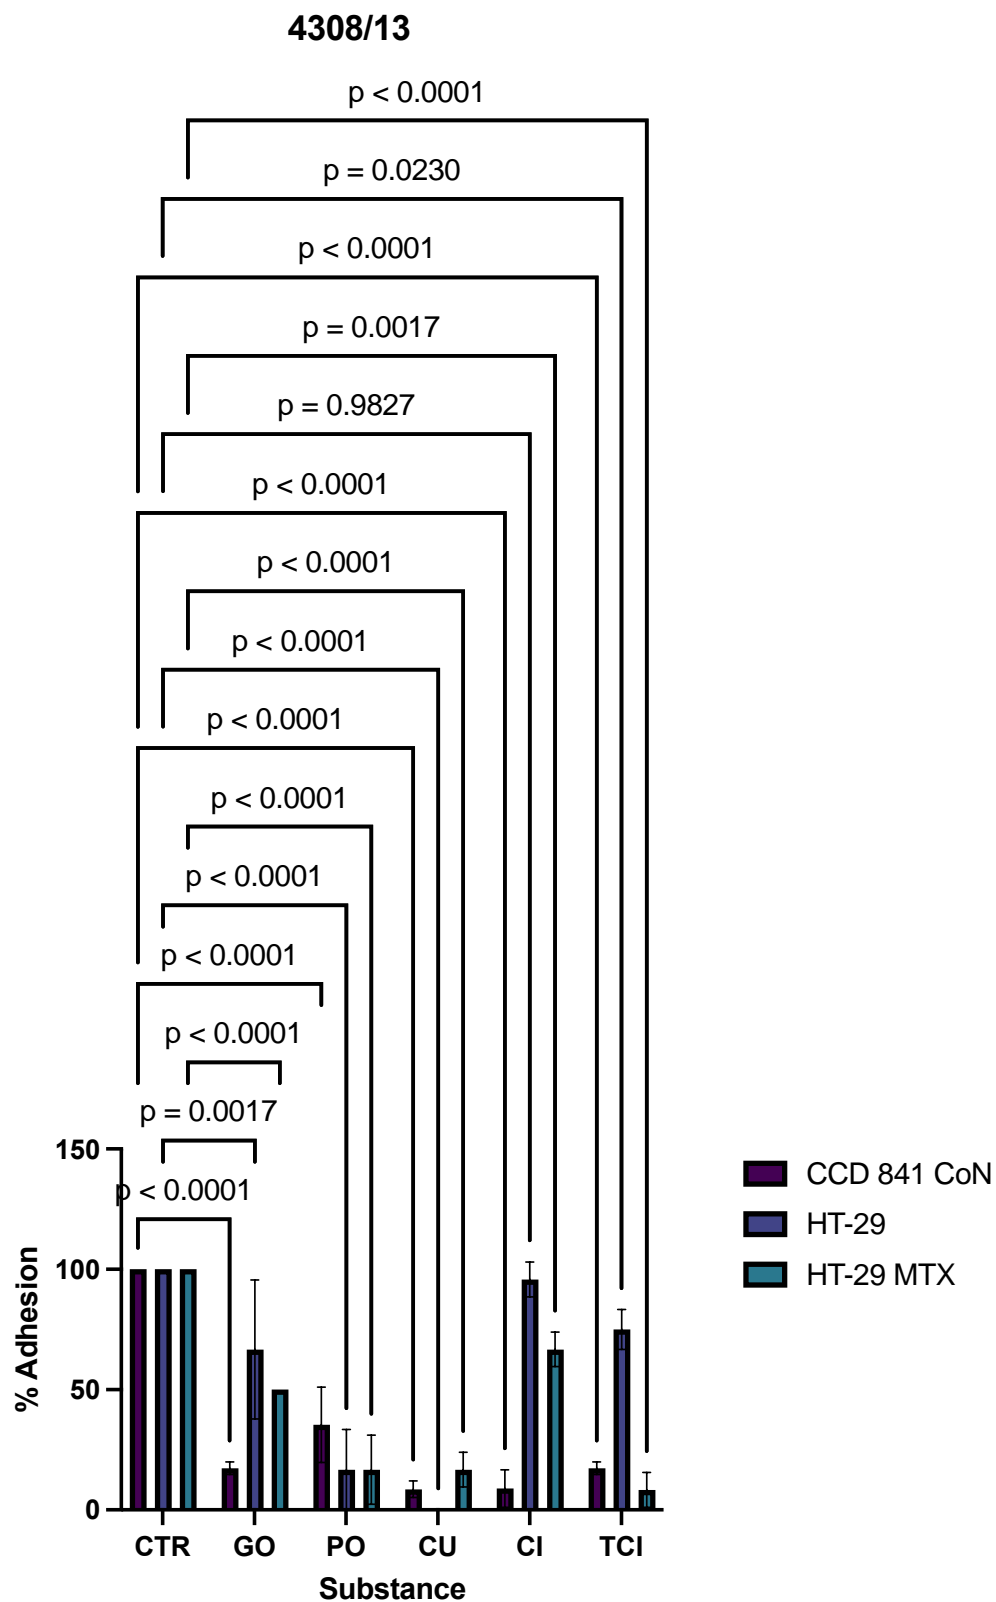

Figure S4. The effects of tested substances on adhesion of *C. difficile* strain 4308/13 to three different cell lines including pairwise comparisons. Error bars represent standard deviations. CTR – positive control; GO – ginger oil; PO – peppermint oil; CU – curcumin; CI – cinnamaldehyde; TCI - trans-cinnamaldehyde.

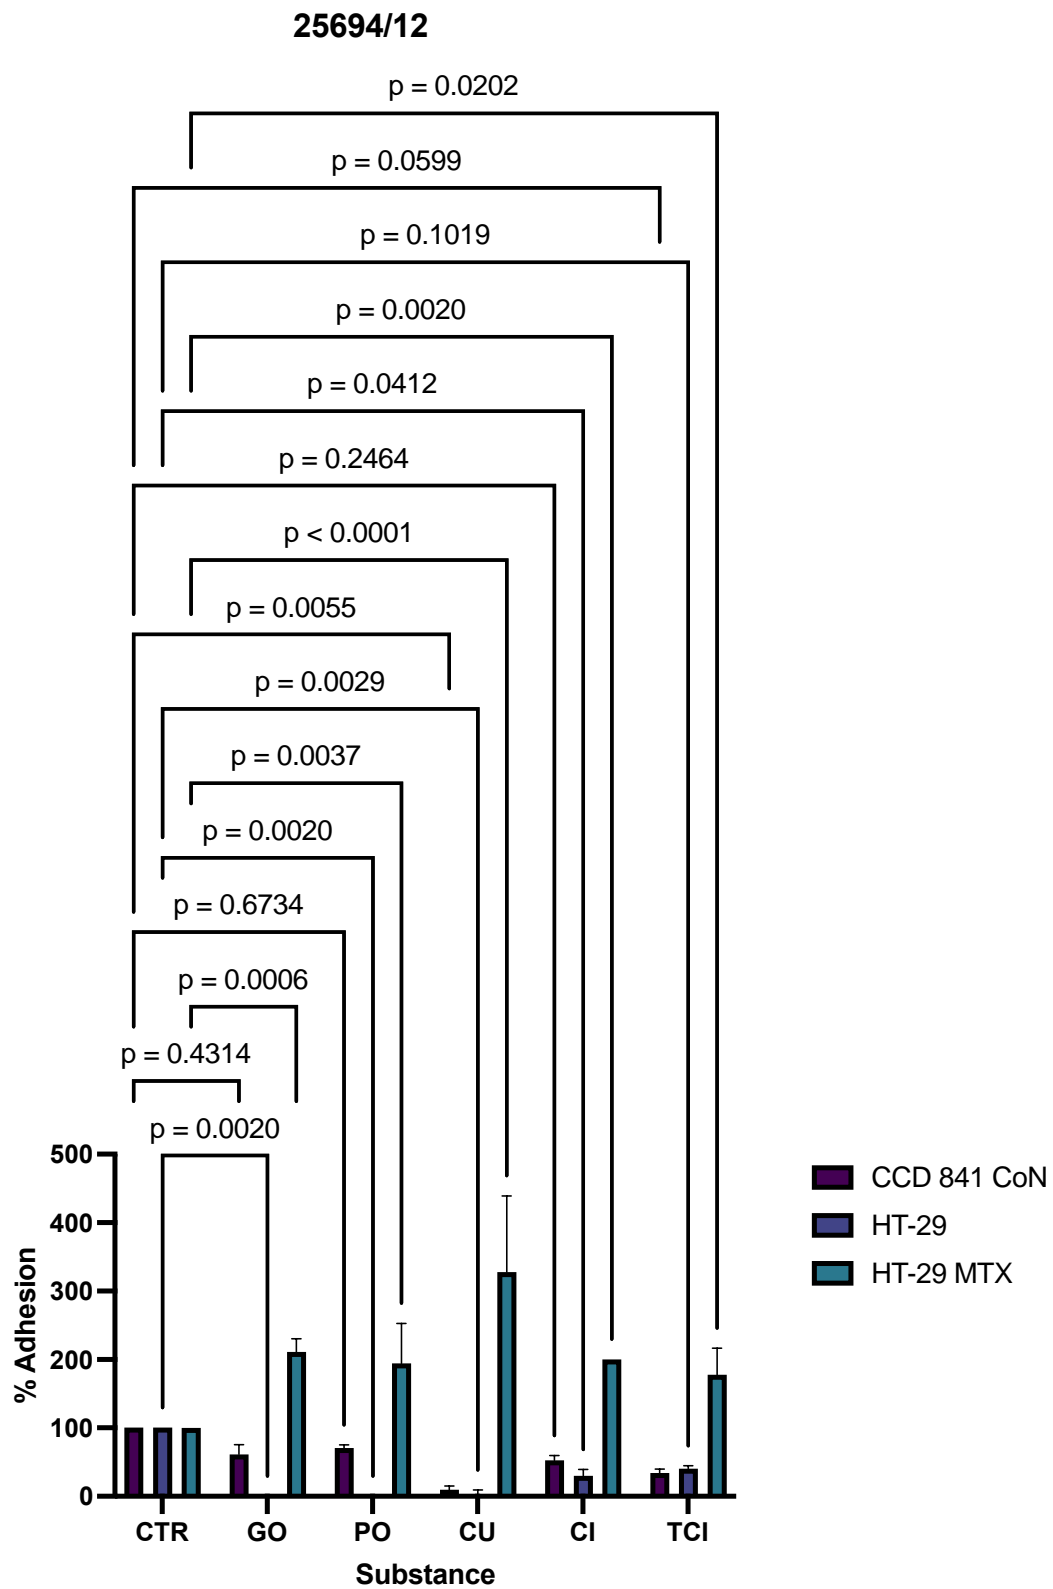

Figure S5. The effects of tested substances on adhesion of *C. difficile* strain 25694/12 to three different cell lines including pairwise comparisons. Error bars represent standard deviations. CTR – positive control; GO – ginger oil; PO – peppermint oil; CU – curcumin; CI – cinnamaldehyde; TCI - trans-cinnamaldehyde.

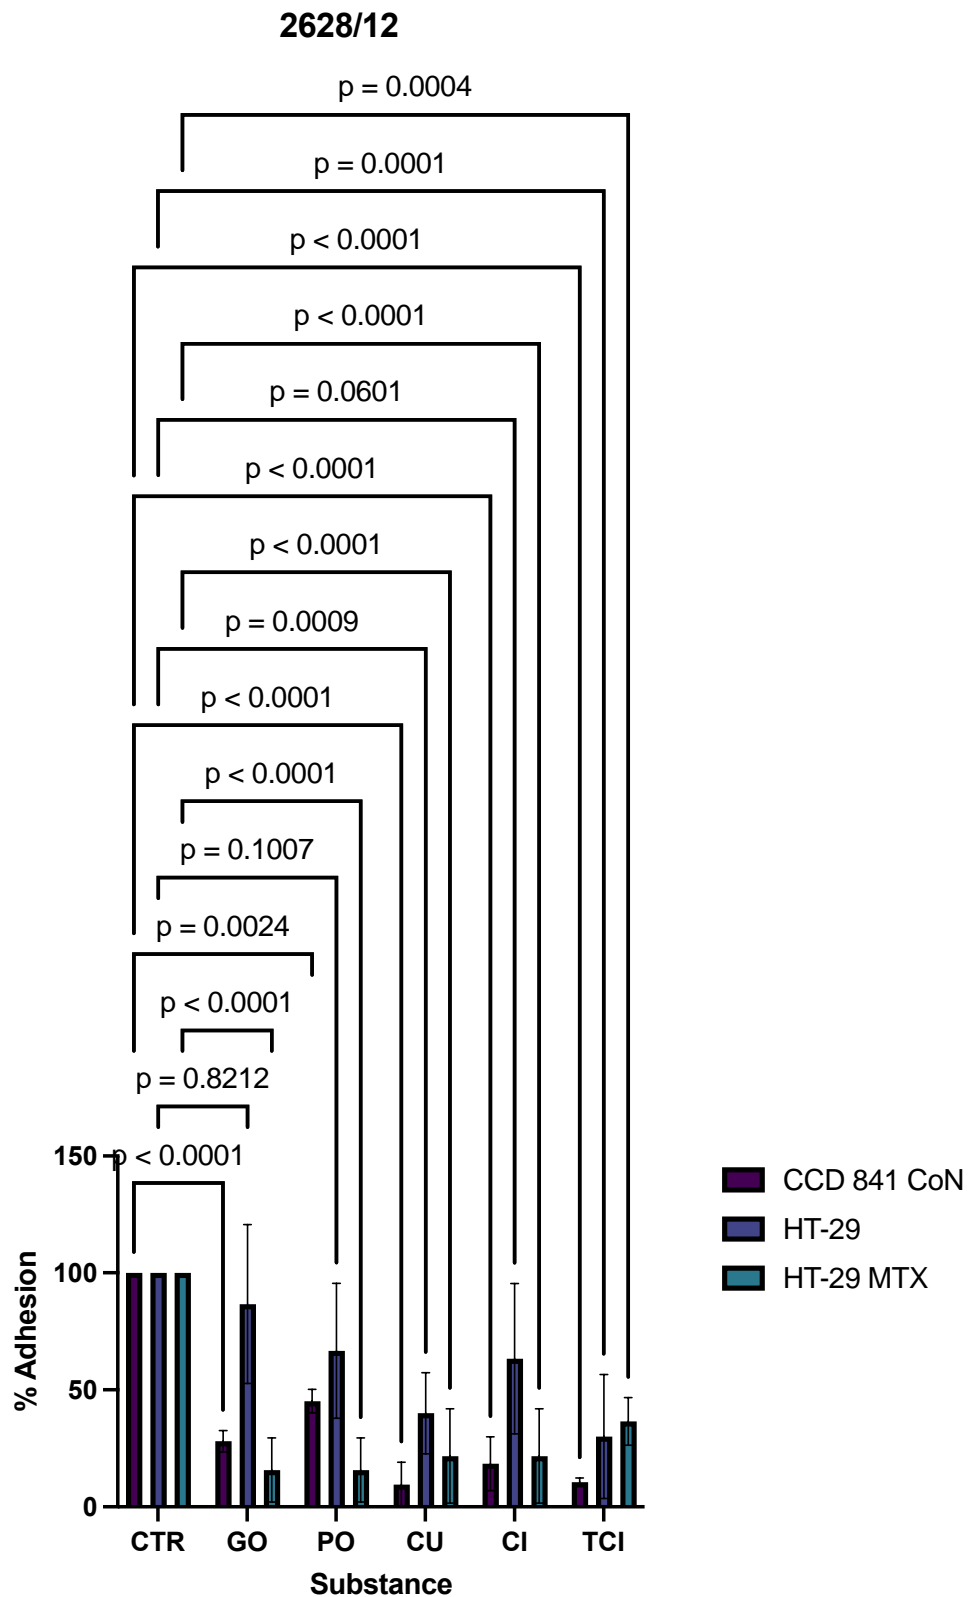

Figure S6. The effects of tested substances on adhesion of *C. difficile* strain 2628/12 to three different cell lines including pairwise comparisons. Error bars represent standard deviations. CTR – positive control; GO – ginger oil; PO – peppermint oil; CU – curcumin; CI – cinnamaldehyde; TCI - trans-cinnamaldehyde.



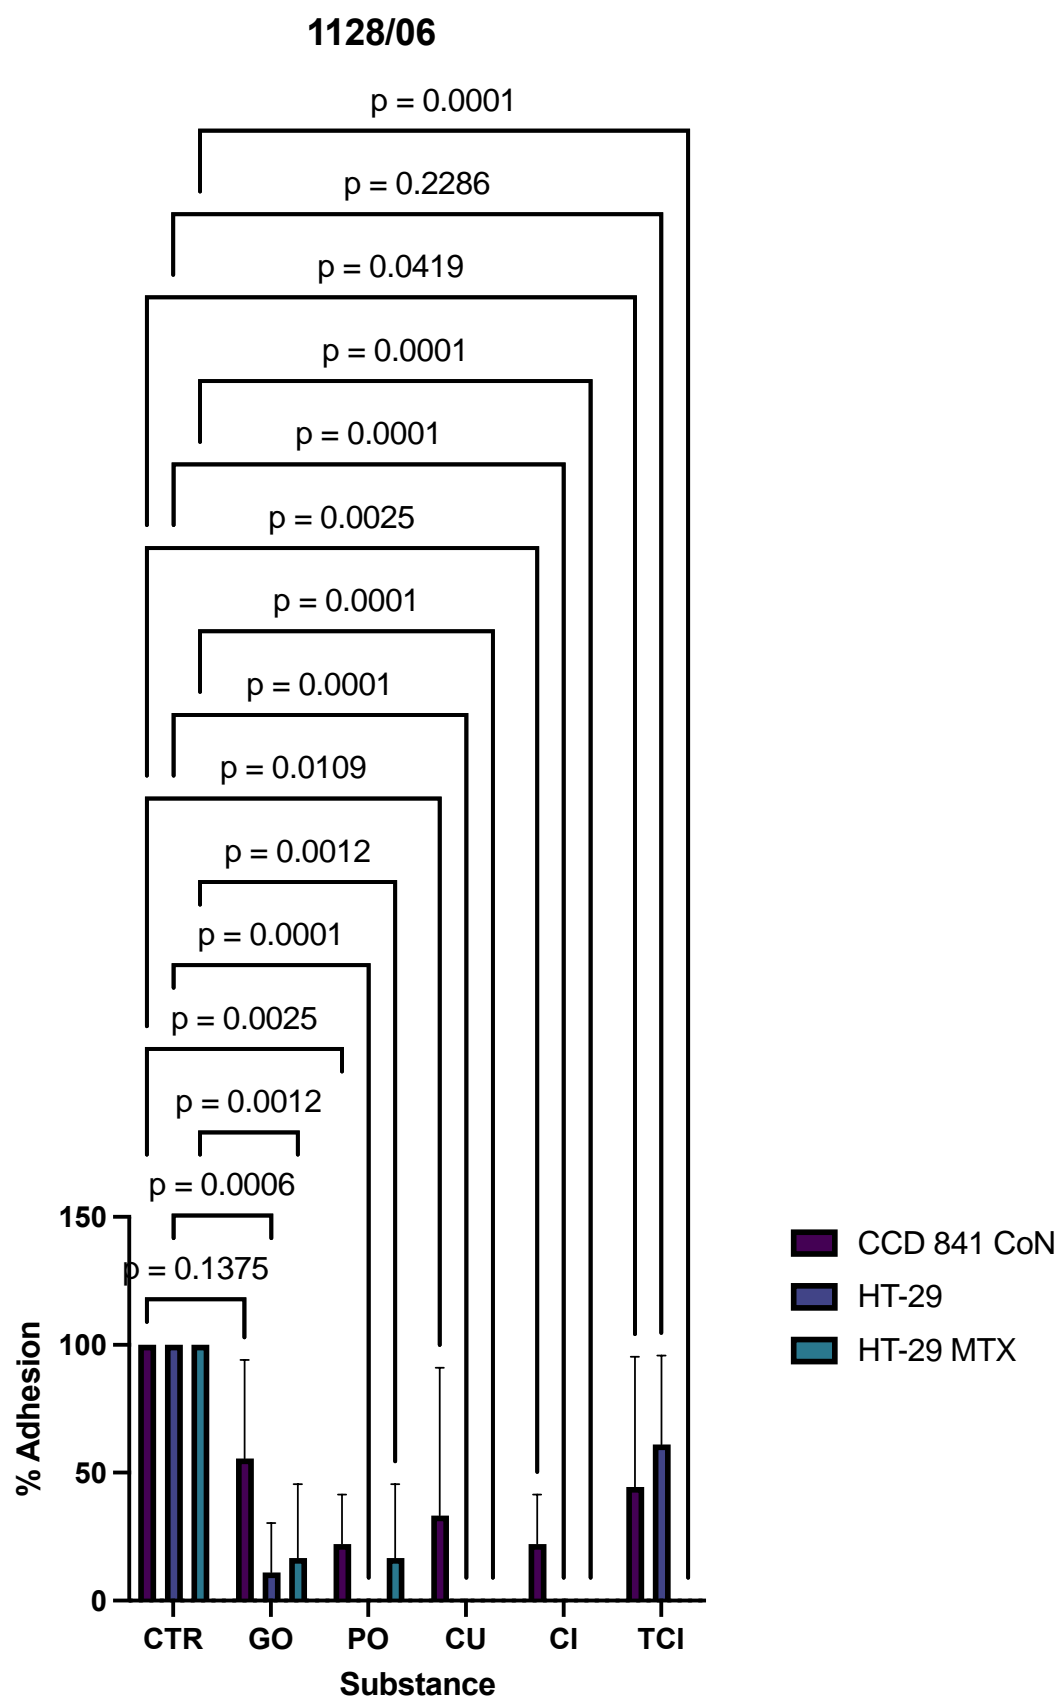

Figure S8. The effects of tested substances on adhesion of *C. difficile* strain 1128/06 to three different cell lines including pairwise comparisons. Error bars represent standard deviations. CTR – positive control; GO – ginger oil; PO – peppermint oil; CU – curcumin; CI – cinnamaldehyde; TCI - trans-cinnamaldehyde.
